# Supplementary material for: Bidirectional Association Between Asthma and Cardiovascular Disease in Middle-Aged and Older Chinese Adults: The Mediating Effect of Frailty
Source: Research Square preprint supplement (doi:10.21203/rs.3.rs-7217886/v1), 2025-08-27
Supplement: Supplementary file 1 [file 30ac926003adde962bba0d9d.docx]

**Construction of the Frailty Index (FI):**

The frailty index (FI) was constructed based on the following 29 items. Except for item 29, each item was dichotomized according to specific criteria, with 0 indicating the absence of a deficit and 1 indicating the presence of a deficit. Item 29 is a continuous variable ranging from 0 to 1, with higher values indicating poorer cognitive function.

To ensure the quality of the FI while addressing missing data and optimizing data utilization, we allowed for a maximum of 20% missing items (i.e., up to 6 items) in the calculation of the FI. If a participant had more than 6 missing items among these indicators, their FI was considered missing.

| **NO.** | **Description of the items** | **Cut-off value** |
| --- | --- | --- |
| 1 | Self-reported diagnosis of hypertension by a doctor | Yes = 1, No = 0 |
| 2 | Self-reported diagnosis of cancer by a doctor |
| 3 | Self-reported diagnosis of arthritis by a doctor |
| 4 | Self-reported diagnosis of chronic lung diseases by a doctor |
| 5 | Self-reported diagnosis of stroke by a doctor |
| 6 | Self-reported diagnosis of emotional, nervous, or psychiatric problems by a doctor |
| 7 | Self-reported diagnosis of memory-related disease by a doctor |
| 8 | Self-reported vision problems |
| 9 | Self-reported hearing problems |
| 10 | Difficulty with dressing | Did not have any problems with the activity=0; some  difficulty with the activity or could not do the activity=1. |
| 11 | Difficulty with bathing or showering |
| 12 | Difficulty with eating |
| 13 | Difficulty with getting in and out of bed |
| 14 | Difficulty with using the toilet |
| 15 | Difficulty with managing money |
| 16 | Difficulty with taking medications |
| 17 | Difficulty with shopping for groceries |
| 18 | Difficulty with preparing meals |
| 19 | Difficulty with doing housework |
| 20 | Difficulty with walking 100 yards |
| 21 | Difficulty with getting up from a chair after sitting for long periods |
| 22 | Difficulty with climbing several flights of stairs  without resting |
| 23 | Difficulty with lifting or carrying weights over 10 pounds/ jins |
| 24 | Difficulty with picking up a coin from the table |
| 25 | Difficulty with stooping, kneeling, or crouching |
| 26 | Difficulty with reaching arms above shoulder level |
| 27 | Self reported health | Poor/ fair = 1, excellent/ very good/ or good = 0 |
| 28 | Depressive symptoms: CESD-10 questionnaire | CESD-10 >10 =1, ≤10 =0 |
| 29 | Cognition: (memory test score + orientation test score) **/** 14 | Continuous, ranging from 0 to 1 |

**Acknowledgments**
We sincerely thank the CHARLS research team for their dedication in data collection and management. Their rigorous efforts in establishing and maintaining this high-quality national cohort have made this study possible.

**Author Contributions**
SYZ: data analysis, manuscript writing. ZHW, KYY: data collection, the data analysis. QJ, JZY, XS, HC: data analysis, manuscript editing. RS, LPC: project development, manuscript editing. LPC: funding acquisition. All authors have read and approved the final manuscript.

**Funding**
This study was supported by the National Key Research and Development Program of China (2019YFC1709901) and the Jilin Provincial Science and Technology Development Program (20220203142SF).

**Data Availability Statement**
The datasets supporting the findings of this study are available from CHARLS at <http://charls.pku.edu.cn/en>.

**Declarations**

**Competing Interests**
The authors have no competing interests to disclose.

**Ethics Approval**
The CHARLS project received official ethics approval from the Institutional Review Board at Peking University (IRB00001052-11015).

**Informed Consent**
All participants provided written informed consent.
